# Supplementary material for: A retrospective analysis of incident pregnancy in phase 1 and 2a HIV-1 vaccine study participants does not support concern for adverse pregnancy or birth outcomes
Source: Springer Nature journal article supplement (doi:10.1186/s12879-021-06431-x), 2021-08-11
Supplement: MOESM2 [file 19562572]

**Additional Table 1.** Details of study products received

| Study      | Study Treatment          | Treatment Arm detail                                         | N women of reproductive potential | Pregnancies in active phase | Pregnancies in Long-term followup |
|------------|--------------------------|--------------------------------------------------------------|-----------------------------------|-----------------------------|-----------------------------------|
| All        | pooled controls          | pooled controls                                              | 496                               | 28                          | 12                                |
| HIVNET 026 | canarypox + protein      | canarypox + gp120 (alum)                                     | 23                                | 4                           | 0                                 |
|            |                          | canarypox + placebo                                          | 21                                | 2                           | 0                                 |
|            |                          | study arms with no pregnancies                               | 26                                | 0                           | 0                                 |
| HVTN 039   | canarypox                | study arms with no pregnancies                               | 6                                 | 0                           | 0                                 |
| HVTN 040   | VEE                      | VEE (10 <sup>4</sup> IU)                                     | 9                                 | 1                           | 0                                 |
|            |                          | study arms with no pregnancies                               | 17                                | 0                           | 0                                 |
| HVTN 041   | protein                  | study arms with no pregnancies                               | 11                                | 1                           | 0                                 |
| HVTN 042   | canarypox + lipopeptide  | 500 mcg lipopeptide                                          | 13                                | 1                           | 0                                 |
|            |                          | canarypox                                                    | 11                                | 1                           | 0                                 |
|            |                          | canarypox + 150 mcg lipopeptide                              | 12                                | 1                           | 0                                 |
|            |                          | canarypox + 50 mcg lipopeptide                               | 14                                | 0                           | 0                                 |
|            |                          | study arms with no pregnancies                               | 7                                 | 1                           | 0                                 |
| HVTN 044   | DNA                      | DNA + 1.5 mg IL-2                                            | 10                                | 0                           | 0                                 |
|            |                          | study arms with no pregnancies                               | 7                                 | 1                           | 0                                 |
| HVTN 045   | DNA                      | 0.3 mg/mL DNA                                                | 10                                | 1                           | 0                                 |
|            |                          | 3.0 mg/mL DNA                                                | 3                                 | 1                           | 0                                 |
| HVTN 048   | DNA                      | 2.0 mg DNA                                                   | 4                                 | 1                           | 0                                 |
|            |                          | 4.0 mg DNA                                                   | 5                                 | 0                           | 0                                 |
| HVTN 049   | DNA + protein            | study arms with no pregnancies                               | 11                                | 1                           | 0                                 |
|            |                          | 100 mcg gp140 (MF59)                                         | 5                                 | 1                           | 0                                 |
|            |                          | 250 mcg DNA + 100 mcg gp140 (MF59)                           | 24                                | 0                           | 0                                 |
| HVTN 050   | Ad5                      | study arms with no pregnancies                               | 63                                | 2                           | 5                                 |
|            |                          | Ad5 (10 <sup>10</sup> vp)                                    | 74                                | 1                           | 12                                |
| HVTN 052   | DNA                      | Ad5 (10 <sup>9</sup> vp)                                     | 49                                | 0                           | 0                                 |
| HVTN 054   | Ad5                      | study arms with no pregnancies                               | 15                                | 0                           | 0                                 |
| HVTN 055   | FPV + MVA                | MVA (10 <sup>9</sup> pfu/mL)                                 | 18                                | 1                           | 0                                 |
|            |                          | study arms with no pregnancies                               | 44                                | 0                           | 0                                 |
| HVTN 056   | peptide                  | peptide (GM-CSF)/RC529-SE                                    | 12                                | 1                           | 0                                 |
|            |                          | study arms with no pregnancies                               | 19                                | 0                           | 0                                 |
| HVTN 057   | DNA + Ad5 boost          | study arms with no pregnancies                               | 25                                | 0                           | 0                                 |
| HVTN 059   | VEE                      | study arms with no pregnancies                               | 10                                | 0                           | 0                                 |
|            |                          | VEE (10 <sup>5</sup> IU)                                     | 10                                | 1                           | 0                                 |
|            |                          | VEE (10 <sup>6</sup> IU)                                     | 7                                 | 1                           | 0                                 |
|            |                          | VEE (10 <sup>8</sup> IU)                                     | 5                                 | 1                           | 0                                 |
|            |                          | study arms with no pregnancies                               | 8                                 | 1                           | 0                                 |
| HVTN 060   | DNA + IL12 DNA + peptide | DNA 1500mcg + 1500 mcg IL-12 DNA (3 dose) + peptide (GM-CSF) | 15                                | 1                           | 0                                 |
|            |                          | DNA 1500mcg + 1500 mcg IL-12 DNA (5 dose)                    | 32                                | 0                           | 0                                 |
|            |                          | study arms with no pregnancies                               | 6                                 | 0                           | 0                                 |
| HVTN 063   | DNA                      | study arms with no pregnancies                               | 24                                | 0                           | 0                                 |
|            | DNA + IL15 DNA           | study arms with no pregnancies                               | 24                                | 0                           | 0                                 |

**Additional Table 1.** Details of study products received

| Study      | Study Treatment           | Treatment Arm detail                                            | N women of reproductive potential | Pregnancies in active phase | Pregnancies in Long-term followup |
|------------|---------------------------|-----------------------------------------------------------------|-----------------------------------|-----------------------------|-----------------------------------|
|            | DNA + IL15 DNA + IL12 DNA | study arms with no pregnancies                                  | 14                                | 0                           | 0                                 |
| HVTN 064   | peptide                   | peptide (0.2 mg)(alum)                                          | 4                                 | 1                           | 0                                 |
|            |                           | study arms with no pregnancies                                  | 21                                | 0                           | 0                                 |
| HVTN 065   | DNA + MVA                 | 3 mg DNA (1 dose) + MVA ( $10^8$ TCID <sub>50</sub> ) (2 dose)  | 16                                | 1                           | 0                                 |
|            |                           | study arms with no pregnancies                                  | 41                                | 0                           | 0                                 |
| HVTN 067   | DNA + MVA                 | study arms with no pregnancies                                  | 13                                | 0                           | 0                                 |
| HVTN 068   | Ad5                       | study arms with no pregnancies                                  | 14                                | 0                           | 0                                 |
|            | DNA + Ad5                 | study arms with no pregnancies                                  | 13                                | 0                           | 0                                 |
| HVTN 069   | DNA + Ad5                 | 4 mg DNA ID + Ad5 ( $10^{10}$ PU)                               | 14                                | 0                           | 4                                 |
|            |                           | 4 mg DNA IM + Ad5 ( $10^{10}$ PU)                               | 13                                | 0                           | 1                                 |
|            |                           | 4 mg DNA SC + Ad5 ( $10^{10}$ PU)                               | 10                                | 1                           | 0                                 |
| HVTN 070   | DNA + IL12 DNA            | 6 mg DNA + 1.5 mg IL-12 DNA                                     | 13                                | 3                           | 0                                 |
|            |                           | 6 mg DNA + 2 mg IL-15 DNA                                       | 13                                | 1                           | 0                                 |
|            |                           | study arms with no pregnancies                                  | 20                                | 0                           | 0                                 |
| HVTN 071   | Ad5                       | Ad5 ( $1.5 \times 10^{10}$ Ad vg)                               | 21                                | 1                           | 0                                 |
| HVTN 072   | DNA + Ad5 + Ad35          | study arms with no pregnancies                                  | 4                                 | 0                           | 0                                 |
| HVTN 073/E | DNA + MVA + protein       | 4 mg DNA + MVA ( $1.49 \times 10^9$ pfu)                        | 10                                | 1                           | 0                                 |
|            |                           | 4 mg DNA + MVA ( $1.49 \times 10^9$ pfu) + 100 mcg gp140 (MF59) | 7                                 | 2                           | 0                                 |
|            |                           | study arms with no pregnancies                                  | 3                                 | 0                           | 0                                 |
| HVTN 076   | DNA + Ad5                 | study arms with no pregnancies                                  | 6                                 | 0                           | 0                                 |
| HVTN 077   | DNA + Ad5 + Ad35          | 4 mg DNA + Ad35 ( $10^{10}$ PU)                                 | 17                                | 0                           | 1                                 |
|            |                           | Ad5 ( $10^{10}$ PU) + Ad35 ( $10^{10}$ PU)                      | 19                                | 1                           | 4                                 |
|            |                           | study arms with no pregnancies                                  | 34                                | 0                           | 0                                 |
| HVTN 078   | attenuated vaccinia + Ad5 | study arms with no pregnancies                                  | 32                                | 0                           | 0                                 |
|            |                           | vaccinia ( $10^7$ PFU) + Ad5 ( $10^{10}$ PU)                    | 22                                | 1                           | 0                                 |
| HVTN 080   | DNA + IL12 DNA            | study arms with no pregnancies                                  | 21                                | 0                           | 0                                 |
| HVTN 082   | DNA + Ad5                 | study arms with no pregnancies                                  | 8                                 | 0                           | 0                                 |
| HVTN 083   | Ad5                       | Ad35 ( $10^{10}$ PU) + Ad5 (Env A) ( $10^{10}$ PU)              | 18                                | 0                           | 1                                 |
|            |                           | Ad35 ( $10^{10}$ PU) + Ad5 (Env B) ( $10^{10}$ PU)              | 9                                 | 1                           | 0                                 |
|            |                           | Ad5 (Env A) ( $10^{10}$ PU)                                     | 23                                | 0                           | 1                                 |
|            |                           | Ad5 (Env A) ( $10^{10}$ PU) + Ad5 (Env B) ( $10^{10}$ PU)       | 18                                | 0                           | 2                                 |
|            |                           | study arms with no pregnancies                                  | 10                                | 0                           | 0                                 |
| HVTN 084   | Ad5                       | Ad5 (Env A/B/C) ( $10^{10}$ PU)                                 | 43                                | 0                           | 8                                 |
|            |                           | Ad5 Gag-Pol ( $5 \times 10^9$ PU)                               | 39                                | 0                           | 11                                |
| HVTN 085   | Ad5                       | Ad5 Gag-Pol ( $5 \times 10^{10}$ PU)                            | 10                                | 0                           | 2                                 |

**Additional Table 1.** Details of study products received

| Study    | Study Treatment                     | Treatment Arm detail                                                                                                    | N women of reproductive potential | Pregnancies in active phase | Pregnancies in Long-term followup |
|----------|-------------------------------------|-------------------------------------------------------------------------------------------------------------------------|-----------------------------------|-----------------------------|-----------------------------------|
| HVTN 086 | DNA + MVA + protein                 | Ad5 Gag-Pol/Env A/B/C (0.25 x 10 <sup>10</sup> PU)                                                                      | 16                                | 0                           | 2                                 |
|          |                                     | study arms with no pregnancies                                                                                          | 11                                | 0                           | 0                                 |
|          |                                     | 4 mg DNA + 100 mcg gp140 (MF59)                                                                                         | 20                                | 0                           | 1                                 |
|          |                                     | 4 mg DNA + MVA (1.45 x 10 <sup>9</sup> pfu)                                                                             | 17                                | 1                           | 1                                 |
|          |                                     | MVA (1.45 x 10 <sup>9</sup> pfu) / 100 mcg gp140 (MF59)(coadministered)                                                 | 18                                | 1                           | 1                                 |
|          |                                     | MVA (1.45 x 10 <sup>9</sup> pfu) + 100 mcg gp140 (MF59)                                                                 | 21                                | 0                           | 2                                 |
| HVTN 087 | DNA + IL12 DNA + VSV                | 3 mg DNA + 1500 mcg IL-12 DNA + VSV (3.4 x 10 <sup>7</sup> PFU)                                                         | 5                                 | 0                           | 1                                 |
| HVTN 088 | protein                             | study arms with no pregnancies                                                                                          | 25                                | 0                           | 0                                 |
| HVTN 090 |                                     | 100 mcg gp140 (MF59)                                                                                                    | 5                                 | 1                           | 0                                 |
| HVTN 092 | DNA + attenuated vaccinia           | Previously vaccinated + 100 mcg gp140 (MF59)                                                                            | 8                                 | 1                           | 0                                 |
|          |                                     | study arms with no pregnancies                                                                                          | 4                                 | 0                           | 0                                 |
|          |                                     | VSV (10 <sup>4</sup> PFU)                                                                                               | 6                                 | 0                           | 2                                 |
|          |                                     | VSV (10 <sup>5</sup> PFU)                                                                                               | 5                                 | 0                           | 1                                 |
|          |                                     | VSV (10 <sup>7</sup> PFU)                                                                                               | 4                                 | 0                           | 1                                 |
|          |                                     | VSV (10 <sup>8</sup> PFU)                                                                                               | 4                                 | 0                           | 1                                 |
| HVTN 094 | DNA + MVA                           | 4 mg DNA (3 doses over 1 month) + vaccinia (1.2 x 10 <sup>8</sup> PFU)                                                  | 27                                | 1                           | 0                                 |
|          |                                     | 4 mg DNA (3 doses over 2 months) + vaccinia (1.2 x 10 <sup>8</sup> PFU)                                                 | 15                                | 1                           | 0                                 |
|          |                                     | study arms with no pregnancies                                                                                          | 25                                | 0                           | 0                                 |
| HVTN 096 | DNA + attenuated vaccinia + protein | 0.3mg DNA + MVA (10 <sup>8</sup> TCID <sub>50</sub> ) (over 10 months)                                                  | 14                                | 0                           | 1                                 |
|          |                                     | 0.3mg DNA + MVA (10 <sup>8</sup> TCID <sub>50</sub> ) (over 8 months)                                                   | 11                                | 1                           | 1                                 |
| HVTN 097 | canarypox + protein                 | 4 mg DNA (2 doses) + vaccinia (15 x 10 <sup>6</sup> PFU)(2 doses)                                                       | 10                                | 0                           | 1                                 |
|          |                                     | 4 mg DNA (2 doses) + vaccinia (15 x 10 <sup>6</sup> PFU)(2 doses) + 600 mcg gp120 (2 doses)(alum)                       | 11                                | 0                           | 4                                 |
|          |                                     | vaccinia (15 x 10 <sup>6</sup> PFU) (4 doses) + 600 mcg gp120 (4 doses)(alum)                                           | 10                                | 2                           | 0                                 |
|          |                                     | vaccinia (15 x 10 <sup>6</sup> PFU)(4 doses) + 600 mcg gp120 (2 doses)(alum)                                            | 10                                | 1                           | 0                                 |
| HVTN 097 | canarypox + protein                 | canarypox (10 <sup>6</sup> CCID <sub>50</sub> ) + gp120 (600 mcg)(MF59)                                                 | 9                                 | 1                           | 0                                 |
|          |                                     | Tetanus toxoid (40 I.U./0.5 mL) + canarypox (10 <sup>6</sup> CCID <sub>50</sub> ) + gp120 (600 mcg)(MF59) + HBV (20mcg) | 29                                | 1                           | 0                                 |

**Additional Table 1.** Details of study products received

| Study        | Study Treatment     | Treatment Arm detail                                                         | N women of reproductive potential | Pregnancies in active phase | Pregnancies in Long-term followup |
|--------------|---------------------|------------------------------------------------------------------------------|-----------------------------------|-----------------------------|-----------------------------------|
| HVTN 098     | DNA + IL12 DNA      | study arms with no pregnancies                                               | 35                                | 0                           | 0                                 |
| HVTN 100     | canarypox + protein | canarypox ( $10^6$ CCID <sub>50</sub> ) + gp120 (200 mcg)(MF59)              | 88                                | 3                           | 0                                 |
| HVTN 105     | DNA + protein       | study arms with no pregnancies                                               | 48                                | 0                           | 0                                 |
| HVTN 106     | DNA + MVA           | 4 mg DNA (clade B) + MVA ( $10^8$ PFU)                                       | 11                                | 1                           | 0                                 |
|              |                     | 4 mg DNA (consensus) + MVA ( $10^8$ PFU)                                     | 11                                | 1                           | 0                                 |
|              |                     | study arms with no pregnancies                                               | 15                                | 0                           | 0                                 |
| HVTN 110     | Ad4 + protein       | study arms with no pregnancies                                               | 4                                 | 0                           | 0                                 |
| HVTN 111     | DNA + protein       | 4 mg DNA (2 doses via Biojector) + 200 mcg gp120 (3 doses)(MF59)             | 11                                | 1                           | 0                                 |
|              |                     | study arms with no pregnancies                                               | 50                                | 0                           | 0                                 |
| HVTN 112     | DNA + VSV           | study arms with no pregnancies                                               | 4                                 | 0                           | 0                                 |
| HVTN 203     | canarypox + protein | canarypox ( $10^{7.26}$ TCID <sub>50</sub> ) + 600 mcg gp120 (2 doses)(alum) | 19                                | 1                           | 0                                 |
|              |                     | canarypox ( $10^{7.26}$ TCID <sub>50</sub> ) + 600 mcg gp120 (3 doses)(alum) | 15                                | 4                           | 0                                 |
|              |                     | study arms with no pregnancies                                               | 27                                | 0                           | 0                                 |
| HVTN 204     | DNA + Ad5           | 4 mg DNA + Ad5 ( $10^{10}$ PU)                                               | 127                               | 7                           | 0                                 |
| HVTN 205     | DNA + MVA           | 3 mg DNA + MVA ( $10^8$ TCID <sub>50</sub> )                                 | 67                                | 2                           | 4                                 |
|              |                     | MVA ( $10^8$ TCID <sub>50</sub> )                                            | 27                                | 1                           | 2                                 |
| <b>Total</b> |                     |                                                                              | <b>2673</b>                       | <b>103</b>                  | <b>90</b>                         |
