# Supplementary material for: A retrospective analysis of incident pregnancy in phase 1 and 2a HIV-1 vaccine study participants does not support concern for adverse pregnancy or birth outcomes
Source: Springer Nature journal article supplement (doi:10.1186/s12879-021-06431-x), 2021-08-11
Supplement: MOESM3 [file 19562572]

**Additional Table 2.** Comparison of Pregnancy Outcomes amongst Different Groups

| <b>Comparisons</b>                          | <b>Fisher's Exact<br/>Test P-value</b> | <b>FDR q-<br/>value</b> |
|---------------------------------------------|----------------------------------------|-------------------------|
| Outcomes by Adjuvants                       |                                        |                         |
| Adverse Outcome                             | 0.8904                                 | 0.8904                  |
| Full-Term Live Birth                        | 0.3781                                 | 0.8904                  |
| Therapeutic/Elective<br>Abortion            | 0.6253                                 | 0.8904                  |
| Outcomes by Geographic Region               |                                        |                         |
| Adverse Outcome                             | 0.2013                                 | 0.3607                  |
| Full-Term Live Birth                        | 0.2404                                 | 0.3607                  |
| Therapeutic/Elective<br>Abortion            | 0.4021                                 | 0.4021                  |
| Outcomes by Injection Status                |                                        |                         |
| Adverse Outcome                             | 0.4506                                 | 0.8544                  |
| Full-Term Live Birth                        | 0.8544                                 | 0.8544                  |
| Therapeutic/Elective<br>Abortion            | 0.6763                                 | 0.8544                  |
| Outcomes by Product Types                   |                                        |                         |
| Adverse Outcome                             | 0.8631                                 | 0.9926                  |
| Full-Term Live Birth                        | 0.9926                                 | 0.9926                  |
| Therapeutic/Elective<br>Abortion            | 0.9569                                 | 0.9926                  |
| Outcomes by Treatments (Vaccine vs Placebo) |                                        |                         |
| Adverse Outcome                             | 1                                      | 1                       |
| Full-Term Live Birth                        | 0.8135                                 | 1                       |
| Therapeutic/Elective<br>Abortion            | 0.789                                  | 1                       |
